# Supplementary material for: [Retracted] Effect of Chinese Traditional Wushu on Cancer‐Related Fatigue, Sleep Quality and Upper Limb Dysfunction of Breast Cancer Survivors: A Systematic Review and Meta‐Analysis
Source: Hindawi journal article supplement (doi:10.1155/2022/6879566), 2022-01-01
Supplement: f1 [file 6879566.f1.zip]

Archive with 3 entries (3 files):
- Supplementary 1 (1).docx
- Supplementary 2 (1).docx
- Supplementary 3 (1).docx
