# Supplementary material for: [Retracted] Effect of Chinese Traditional Wushu on Cancer‐Related Fatigue, Sleep Quality and Upper Limb Dysfunction of Breast Cancer Survivors: A Systematic Review and Meta‐Analysis
Source: Hindawi journal article supplement (doi:10.1155/2022/6879566), 2022-01-01
Supplement: f1 [file 6879566.f1.zip › Supplementary 2 (1).docx]

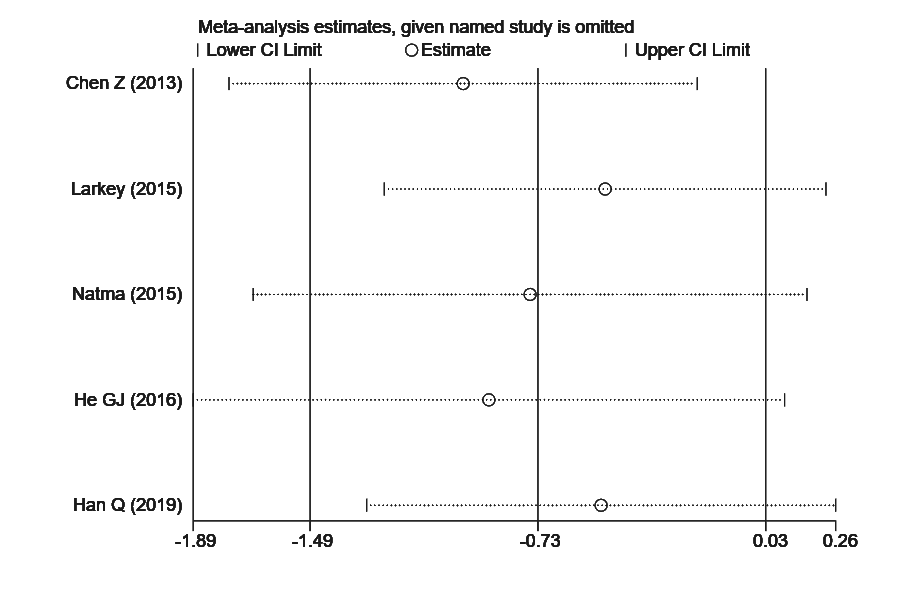


Figure S1: CRF sensitivity analyses


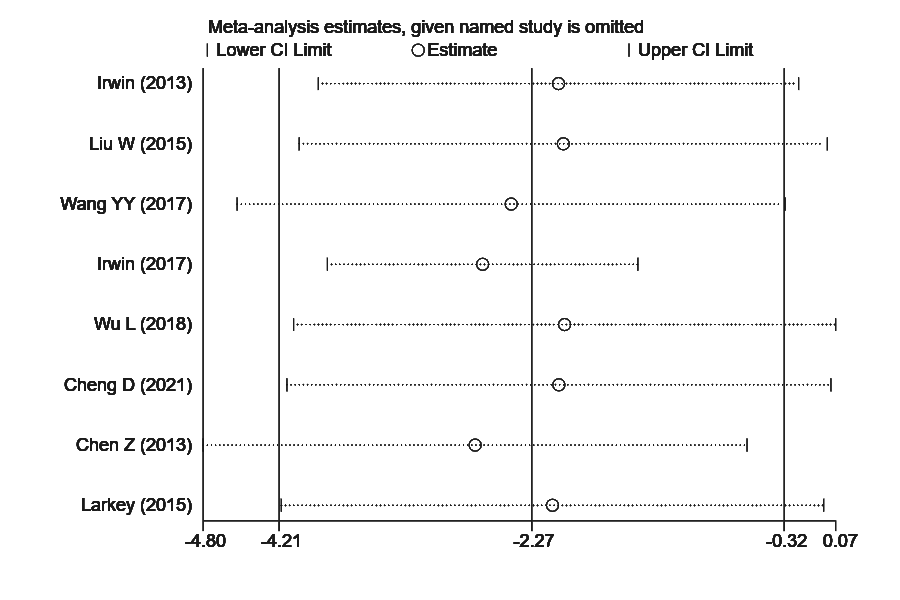


Figure S2: PSQI sensitivity analyses


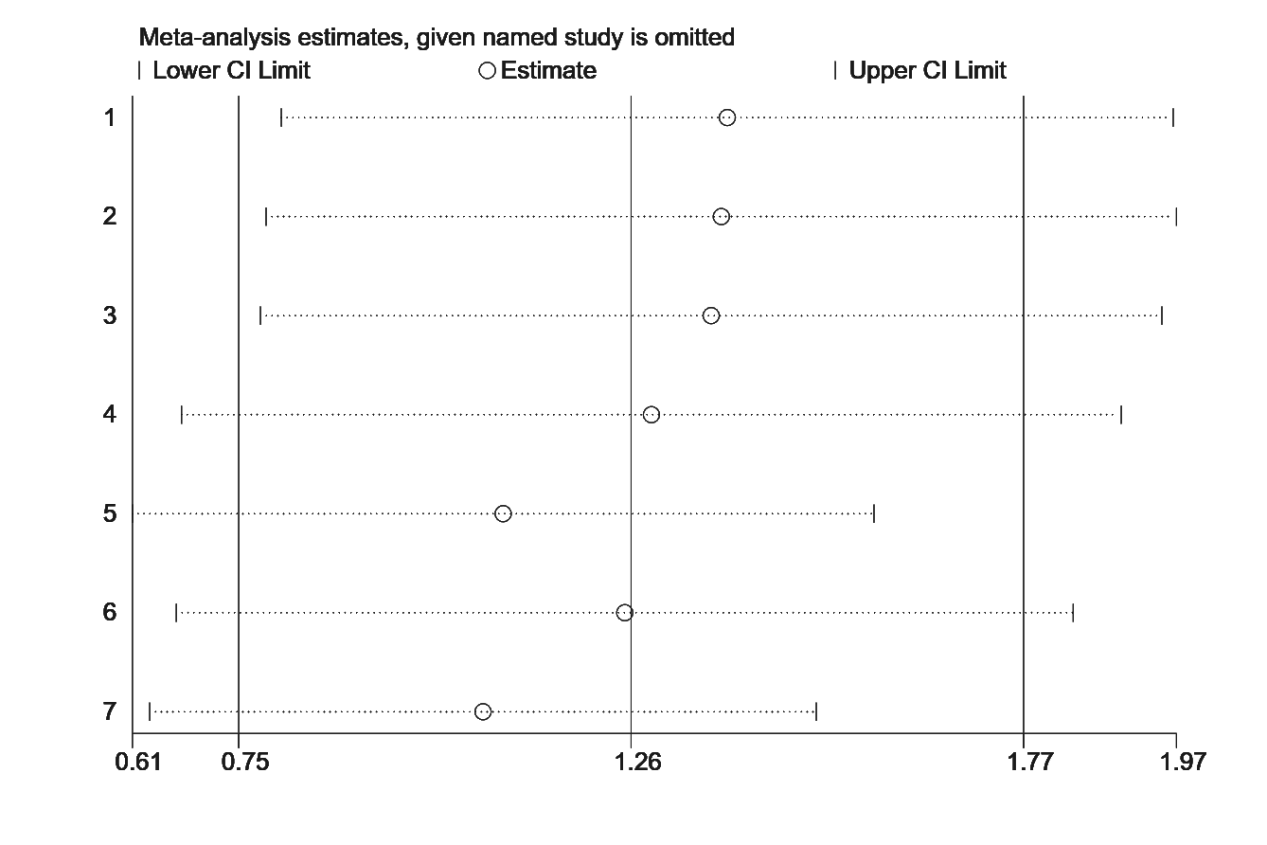


Figure S3: upper limb dysfunction sensitivity analyses
