# Supplementary material for: [Retracted] Effect of Chinese Traditional Wushu on Cancer‐Related Fatigue, Sleep Quality and Upper Limb Dysfunction of Breast Cancer Survivors: A Systematic Review and Meta‐Analysis
Source: Hindawi journal article supplement (doi:10.1155/2022/6879566), 2022-01-01
Supplement: f1 [file 6879566.f1.zip › Supplementary 3 (1).docx]

Table S2. Search strategy (Pubmed).

| Pubmed | Search terms for query | Results |
| --- | --- | --- |
| #1 | (((((((((((((((("Breast Neoplasms"[Mesh]) OR (Breast Neoplasm)) OR (Breast Tumors)) OR (Breast Tumor)) OR (Breast Cancer)) OR (Mammary Cancer)) OR (Cancers, Mammary)) OR (Malignant Neoplasm of Breast)) OR (Breast Malignant Neoplasms)) OR (Malignant Tumor of Breast)) OR (Breast Malignant Tumors)) OR (Mammary Carcinoma, Human)) OR (Carcinoma, Human Mammary)) OR (Carcinomas, Human Mammary)) OR (Breast Carcinoma)) OR (Breast Carcinomas)) OR (Neoplasm, Human Mammary) Filters: from 1945/1/1 - 2021/8/1 | 462441 |
| #2 | (((((((("Fatigue"[Mesh]) OR (Lassitude)) OR (Cancer related fatigue)) OR (CRF)) OR (Sleep quality)) OR (Sleep disorder)) OR (Dysfunction)) OR (Upper limb dysfunction)) OR (Upper limb dysfunction after breast cancer surgery) Filters: from 1945/1/1 - 2021/8/1 | 2327312 |
| #3 | (#1) AND (#2) | 18057 |
| #4 | (((((((Chinese traditional sports) OR (mind-body exercise)) OR (TaiChi)) OR (Qigong)) OR (Baduanjin)) OR (Yijinjing)) OR (Wuqinxi)) OR (Liuzijue) Filters: from 1945/1/1 - 2021/8/1 | 2597 |
| #5 | (#3) AND (#4) | 283 |

Table S3. Search strategy (Web of Science).

| Web of Science | Search terms for query | Results |
| --- | --- | --- |
| #1 | ((((((((((((((((TI=(Breast Neoplasms)) OR TI=(Breast Neoplasm)) OR TI=(Breast Tumors)) OR TI=(Breast Tumor)) OR TI=(Breast Cancer)) OR TI=(Mammary Cancer)) OR TI=(Cancers, Mammary)) OR TI=(Malignant Neoplasm of Breast)) OR TI=(Breast Malignant Neoplasms)) OR TI=(Breast Malignant Neoplasms)) OR TI=(Breast Malignant Tumors)) OR TI=(Mammary Carcinoma, Human)) OR TI=(Carcinoma, Human Mammary)) OR TI=(Carcinomas, Human Mammary)) OR TI=(Breast Carcinoma)) OR TI=(Breast Carcinomas)) OR TI=(Neoplasm, Human Mammary)  Timespan: 1950-01-01 to 2021-08-01 | 360566 |
| #2 | ((((((((TS=(Fatigue)) OR TS=(Lassitude)) OR TS=(Cancer related fatigue)) OR TS=(CRF)) OR TS=(Sleep quality)) OR TS=(Sleep disorder)) OR TS=(Dysfunction)) OR TS=(Upper limb dysfunction)) OR TS=(Upper limb dysfunction after breast cancer surgery)  Timespan: 1950-01-01 to 2021-08-01 | 1296067 |
| #3 | #1 AND #2 | 6666 |
| #4 | (((((((TS=(Chinese traditional sports)) OR TS=(mind-body exercise)) OR TS=(TaiChi)) OR TS=(Qigong)) OR TS=(Baduanjin)) OR TS=(Yijinjing)) OR TS=(Wuqinxi)) OR TS=(Liuzijue)  Timespan: 1950-01-01 to 2021-08-01 | 3172 |
| #5 | #3 AND #4 | 172 |

Table S4. Search strategy (CNKI).

| 中国知网 | 主题词 | 结果 |
| --- | --- | --- |
| #1 | （乳腺癌）或含（乳腺肿瘤）或含（乳腺癌患者）或含（乳腺癌术后）或含（乳腺恶性肿瘤）  发表时间：1950-01-01至2021-08-01 | 122410 |
| #2 | （癌因性疲乏）或含（CRF）或含（睡眠质量）或含（睡眠障碍）或含（上肢功能障碍）  发表时间：1950-01-01至2021-08-01 | 20351 |
| #3 | #1 AND #2 | 5637 |
| #4 | （传统体育运动）或含（太极拳）或含（健身气功）或含（八段锦）或含（六字诀） | 28623 |
| #5 | #3 AND #4 | 196 |
